# Supplementary material for: The Physicochemical Characteristics and Heavy Metal Retention Capability of Black Liquor Lignin-Based Biochars
Source: MDPI journal article supplement (doi:10.3390/molecules28237694), 2023-11-21
Supplement: s1 [file s1]

## *Supplementary materials*

for

### **Characteristics and Cd(II) adsorption capability of black liquor lignin-based biochars: Effect of pyrolysis temperature**

#### **1 Data analysis**

##### **1.1 Adsorption isotherm model analysis**

Adsorption isotherms were analyzed using the Langmuir model and the Freundlich model to explore how the adsorbate interacts with the adsorbent [1]. Among them, the calculation equation of the Langmuir model is:

$$Q_e = \frac{Q_m K_l C_e}{1 + K_l C_e} \quad \text{Eq. S1}$$

The calculation equation of the Freundlich model is:

$$Q_e = K_f C_e^{1/n} \quad \text{Eq. S2}$$

where,  $Q_e$  is the equilibrium adsorption capacity of Cd(II) by LGBCs (mg/g);  $C_e$  is the equilibrium concentration of Cd(II) solution after adsorption by LGBCs (mg/L);  $Q_m$  is the theoretical maximum adsorption capacity (mg/g);  $K_l$  is the Langmuir adsorption constant (L/mg) related to the interaction energy;  $K_f$  is the Freundlich affinity coefficient ((mg<sup>(1-n)</sup>L<sup>n</sup>)/g);  $n$  is the Freundlich intensity constant.

##### **1.2 Adsorption kinetic model analysis**

The adsorption kinetics were explained using pseudo-first-order kinetics and pseudo-second-order kinetics. Among them, the pseudo-first-order kinetics mainly describe the adsorption rate in the liquid system [2], and the calculation equation of this model is:

$$\frac{dQ_t}{dt} = k_1 (Q_{e,the} - Q_t) \quad \text{Eq. S3}$$

The pseudo-second-order kinetics is used to describe the chemisorption between metal ions and adsorption sites of the adsorbent during the adsorption process, and the calculation equation of this model is:

$$\frac{dQ_t}{dt} = k_2 (Q_{e,the} - Q_t)^2 \quad \text{Eq. S4}$$

where,  $t$  is the reaction time (h);  $Q_t$  is the adsorption amount of Cd(II) by LGBCs at the reaction time point  $t$  (mg/g);  $Q_{e,the}$  is the calculated equilibrium adsorption amount of Cd(II) by LGBCs (mg)/g;  $k_1$  is the adsorption rate constant (h<sup>-1</sup>);  $k_2$  is the adsorption rate constant (g/(mg·h)).

### 1.3 Thermodynamic analysis

The adsorption thermodynamic model is a crucial to describe the metal adsorption process and explore the mechanism, which can be characterized by three parameters regarding to Gibbs free energy ( $\Delta G^0$ ), enthalpy ( $\Delta H^0$ ), and entropy ( $\Delta S^0$ ).

$$\Delta G^0 = -RT \ln K_e \quad \text{Eq.S5}$$

$K_e$  needs to be calculated from the partition constant ( $K_w$ ) and the density of the solvent ( $\rho$ ):

$$K_w = \frac{Q_e}{C_e} \quad \text{Eq.S6}$$

$$K_e = \rho K_w = \rho \frac{Q_e}{C_e} \quad \text{Eq.S7}$$

Since the density of water is 1 g/cm<sup>3</sup>, Equation Eq.S7 can be written as:

$$K_e = \frac{Q_e}{C_e} \quad \text{Eq.S8}$$

During the reaction process,  $\Delta G^0$ ,  $\Delta H^0$  and  $\Delta S^0$  have the following equations:

$$\Delta G^0 = \Delta H^0 - T\Delta S^0 \quad \text{Eq.S9}$$

Combined with Equation (13), we get:

$$\ln K_e = -\frac{\Delta H^0}{RT} + \frac{\Delta S^0}{R} \quad \text{Eq.S10}$$

where,  $K_e$  is the dimensionless adsorption equilibrium constant;  $R$  is the gas molar constant (8.314 J/(mol·K));  $T$  is the absolute temperature (K);  $Q_e$  is the equilibrium adsorption amount of Cd(II) by LGBCs (mg/g);  $C_e$  is the equilibrium concentration (mg/L) after adsorption of Cd(II) solution by LGBCs;  $\rho$  is the density of water (g/cm<sup>3</sup>).

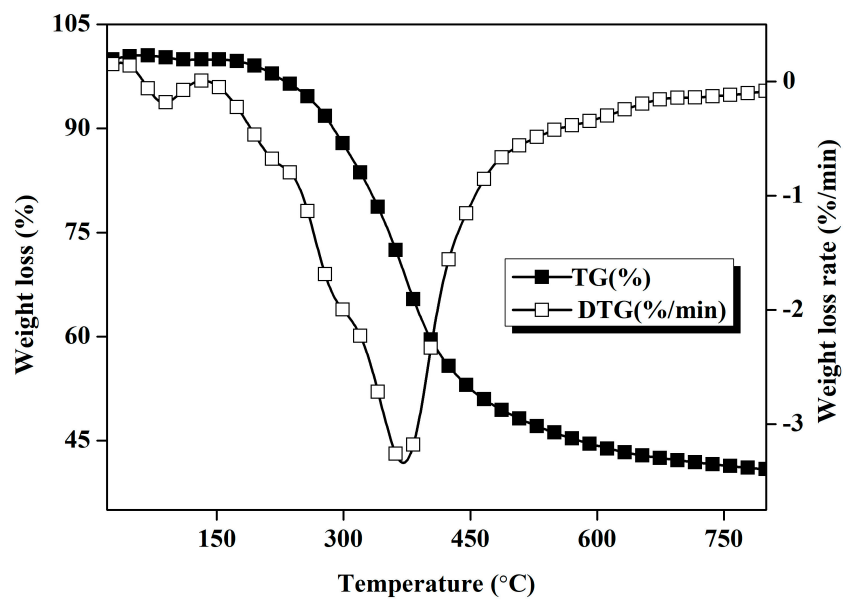

**Figure S1.** TG and DTG curves of LG

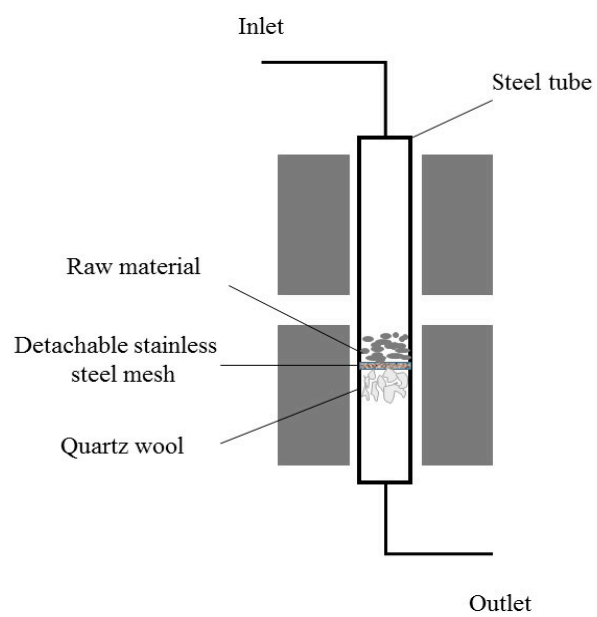

**Figure S2.** Experimental setup

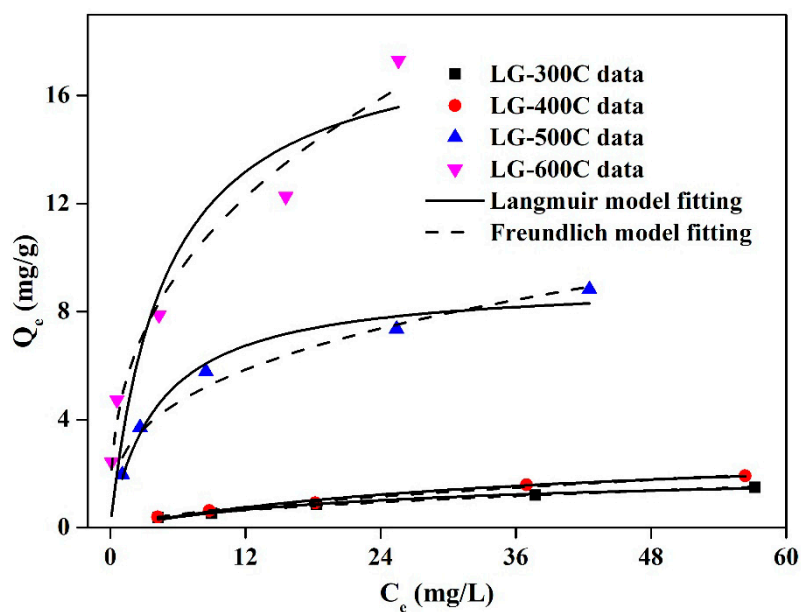

**Figure S3.** Adsorption isotherm fitting of Cd(II) adsorption on LGBCs ( $C_e$  and  $Q_e$  are the equilibrium concentration of Cd(II) after adsorption and adsorption capacity of Cd(II) by LGBCs, respectively). The initial concentration of Cd(II), contact time, ambient temperature, and solution pH were set as follows: 5~60 mg/L, 8 h, 25 °C, and 5, respectively.

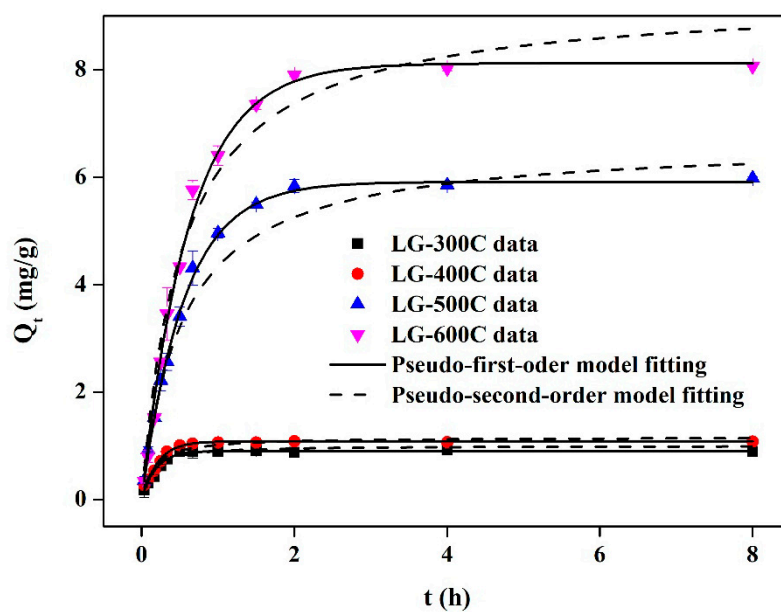

**Figure S4.** Adsorption kinetics fitting of Cd(II) adsorption on LGBCs ( $t$  and  $Q_t$  are contact time and the adsorption capacity at contact time  $t$ , respectively). The initial concentration of Cd(II), contact time, ambient temperature, and solution pH were set as follows: 20 mg/L, 2 min~8 h, 25 °C, and 5, respectively.

**Table S1 Physicochemical properties of LG**

| Elemental analysis |      |       |      | Proximate analysis |                    |      | Other |                       |
|--------------------|------|-------|------|--------------------|--------------------|------|-------|-----------------------|
| C                  | H    | O     | S    | Fixed<br>carbon    | Volatile<br>matter | Ash  | pH    | Specific surface area |
| %                  |      |       |      | %                  |                    |      |       | m <sup>2</sup> /g     |
| 59.62              | 5.74 | 30.14 | 1.69 | 27.41              | 67.52              | 2.81 | 5.62  | 1.13                  |

## References:

1. Qin, K.; Li, J.; Yang, W.; Wang, Z.; Zhang, H., Role of minerals in mushroom residue on its adsorption capability to Cd(II) from aqueous solution. *Chemosphere* **2023**, 324, 138290.
2. Kılıç, M.; Kırbyık, Ç.; Çepelioğullar, Ö.; Pütün, A. E., Adsorption of heavy metal ions from aqueous solutions by bio-char, a by-product of pyrolysis. *Applied Surface Science* **2013**, 283, (0), 856-862.
